# Supplementary material
Source: PubMed Central journal article supplement (PMC5539838)
Supplement: jamapsychiatry-74-615-s001.pdf [file jamapsychiatry-74-615-s001.pdf]

## Supplementary Online Content

Sahlin H, Kuja-Halkola R, Bjureberg J, et al. Association between deliberate self-harm and violent criminality. *JAMA Psychiatry*. Published online April 5, 2017.  
doi:10.1001/jamapsychiatry.2017.0338

**eTable 1.** *ICD-10* and *ICD-9* Codes for Psychiatric Diagnoses

**eTable 2.** Hazard Ratios of Any Crime Conviction After Exposure to DSH-Associated Care Compared to Unexposed (N = 1,787,425)

**eTable 3.** Hazard Ratios of DSH-Associated Care After Conviction of a Violent Crime Compared to Individuals Not Convicted of a Violent Crime Adjusted for Gender and Birth Year (N = 1,787,425)

**eTable 4.** Hazard Ratios of DSH-Associated Care After Conviction of a Violent or a Nonviolent Crime, Adjusted for Gender and Birth Year (N = 1,787,425)

**eTable 5.** Hazard Ratios of Violent Crime Conviction Depending on Level of Intent (Deliberate or Undetermined) of the DSH Event (N = 1,787,425)

**eTable 6.** Hazard Ratios of Violent Crime Conviction Depending on Level of Lethality of the DSH Event and Adjusted for Gender Using (N = 1,787,425)

**This supplementary material has been provided by the authors to give readers additional information about their work.**

**eTable 1. ICD-10 and ICD-9 Codes for Psychiatric Diagnoses**

| <b>Psychiatric diagnosis</b>                    | <b>ICD-10</b>   | <b>ICD-9</b>                                                              |
|-------------------------------------------------|-----------------|---------------------------------------------------------------------------|
| Substance use disorder                          | F10-F19         | 303, 304, 305A, 305X                                                      |
| Psychotic disorders                             | F20 - F29, F323 | 295, 297, 298, 291A, 291B, 291C, 291D, 291W, 291X, 292A, 292B, 292D, 291X |
| Bipolar disorder                                | F30, F31        | 296A, 296C, 296D, 296E, 296W                                              |
| Depression                                      | F32–F34         | 311, 296B, 300E                                                           |
| Anxiety                                         | F40–F43         | 300, 308, 309                                                             |
| Autism spectrum disorders                       | F84             | 299                                                                       |
| Attention-deficit hyperactivity disorder (ADHD) | F90             | 314                                                                       |
| Antisocial personality disorder (ASPD)          | F602            | 301H                                                                      |
| Borderline personality disorder (BPD)           | F603            | 301D, 301J                                                                |

**eTable 2.** Hazard Ratios of Any Crime Conviction After Exposure to DSH-Associated Care Compared to Unexposed (N = 1,787,425)

|                                     | Crude |           | Adjusted <sup>b</sup> |           | Fully adjusted <sup>c</sup> |           |
|-------------------------------------|-------|-----------|-----------------------|-----------|-----------------------------|-----------|
|                                     | HR    | 95% CI    | HR                    | 95% CI    | HR                          | 95% CI    |
| Total cohort <sup>a</sup>           | 3.1   | (3.1–3.2) | 2.8                   | (2.8–2.9) | 1.6                         | (1.5–1.6) |
| Men                                 | 2.9   | (2.8–2.9) | 2.7                   | (2.6–2.7) | 1.5                         | (1.5–1.6) |
| Women                               | 3.1   | (3.1–3.2) | 3.0                   | (3.0–3.1) | 1.6                         | (1.6–1.7) |
| <b>With time-varying covariates</b> |       |           |                       |           |                             |           |
| Total cohort <sup>a</sup>           | 3.0   | (2.9–3.0) | 2.7                   | (2.6–2.7) | 1.7                         | (1.7–1.8) |
| Men                                 | 2.4   | (2.3–2.5) | 2.3                   | (2.2–2.4) | 1.6                         | (1.6–1.7) |
| Women                               | 3.5   | (3.4–3.5) | 2.7                   | (2.7–2.8) | 1.4                         | (1.4–1.5) |

Note. Precision of estimates calculated using robust standard errors

<sup>a</sup> The *total cohort* estimates are adjusted for gender by stratification

<sup>b</sup> Adjusted for birth-year, bipolar disorder, BPD and ASPD

<sup>c</sup> Adjusted for birth-year, BPD, ASPD, bipolar disorder, any substance use disorders, psychotic disorders, autism, ADHD, anxiety disorders, eating disorders, depression, mother's education level and family income at age 13.

**eTable 3.** Hazard Ratios of DSH-Associated Care After Conviction of a Violent Crime Compared to Individuals Not Convicted of a Violent Crime Adjusted for Gender and Birth Year (N = 1,787,425)

|                           | Crude |         | Adjusted <sup>b</sup> |         | Fully adjusted <sup>c</sup> |         |
|---------------------------|-------|---------|-----------------------|---------|-----------------------------|---------|
|                           | HR    | 95% CI  | HR                    | 95% CI  | HR                          | 95% CI  |
| Total cohort <sup>a</sup> | 5.2   | 5.1–5.3 | 4.3                   | 4.1–4.4 | 1.9                         | 1.8–1.9 |
| Men                       | 4.6   | 4.5–4.8 | 4.4                   | 4.2–4.5 | 2.0                         | 1.9–2.1 |
| Women                     | 6.9   | 6.6–7.2 | 4.1                   | 3.9–4.4 | 1.7                         | 1.7–1.9 |

**With time-varying covariates**

|                           |     |         |     |         |     |         |
|---------------------------|-----|---------|-----|---------|-----|---------|
| Total cohort <sup>a</sup> | 4.9 | 4.8–5.1 | 4.2 | 4.0–4.3 | 1.9 | 1.8–1.9 |
| Men                       | 4.6 | 4.4–4.8 | 4.2 | 4.1–4.4 | 2.0 | 1.9–2.0 |
| Women                     | 6.2 | 5.9–6.6 | 4.0 | 3.7–4.3 | 1.8 | 1.7–1.9 |

Note. Precision of estimates calculated using robust standard errors

<sup>a</sup> The *total cohort* estimates are adjusted for gender by stratification

<sup>b</sup> Adjusted for birth-year, bipolar disorder, BPD and ASPD

<sup>c</sup> Adjusted for birth-year, BPD, ASPD, bipolar disorder, any substance use disorders, psychotic disorders, autism, ADHD, anxiety disorders, eating disorders, depression, mother's education level and family income at age 13.

**eTable 4.** Hazard Ratios for Receiving DSH-Associated Care if Having Been Convicted of a Violent or a Nonviolent Crime Adjusted for Gender (by Stratification) and Birth Year (N = 1,787,425)

|                   | Crude |         |
|-------------------|-------|---------|
|                   | HR    | 95% CI  |
| Violent crime     | 3.1   | 3.0–3.2 |
| Non-violent crime | 2.7   | 2.7–2.8 |

Note. Precision of estimates calculated using robust standard errors

**eTable 5.** Hazard Ratios of Violent Crime Conviction Depending on Level of Intent (Deliberate or Undetermined) of the DSH Event Adjusted for Gender (by Stratification) (N = 1,787,425)

|                              | <b>Crude</b> |         |
|------------------------------|--------------|---------|
|                              | HR           | 95% CI  |
| Deliberate self-harm         | 7.1          | 6.9–7.3 |
| Event of undetermined intent | 3.1          | 2.9–3.2 |

Note. Precision of estimates calculated using robust standard errors

**eTable 6.** Hazard Ratios of Violent Crime Conviction Depending on Level of Lethality of the DSH Event Adjusted for Gender (N = 1,787,425)

|                  | <b>Crude</b> |          |
|------------------|--------------|----------|
|                  | HR           | 95% CI   |
| Low lethality    | 4.3          | 4.2–4.4  |
| Medium lethality | 5.0          | 4.5–5.5  |
| High lethality   | 10.2         | 8.7–12.0 |

Note. Precision of estimates calculated using robust standard errors

Note. Grouping of lethality of ICD-10 and ICD-9 self-harm codes derived from Runeson et al.<sup>2</sup>
